# Supplementary material
Source: publisher figshare collection journal article supplement (https://sage.figshare.com/ndownloader/files/17775158)

**Figure1. Sources of information in percentage (%)  
from responses (n=1223)**

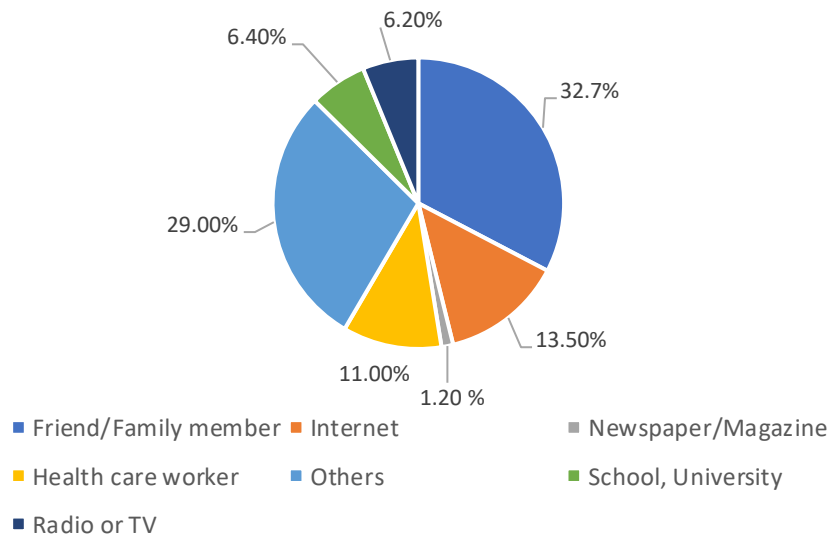

Supplement: Supplementary file 1 [file 17775158]
